# Supplementary material
Source: Springer Nature journal article supplement (https://www.springermedizin.de/resource/supplementary/12911_2006_141_MOESM4_ESM.pdf/9527216)
Supplement: MOESM4 [file 9527216]

## Kategorier



- category 1
- category 2
- category 3
- Testmallar
  - HypofysCentrum
  - RaH
  - GynOp
  - HivBivus
  - Astma/KOL
  - RA registret
  - Duchenne
  - Sårvård
  - Diabetes
  - Gynop Pat enkät
  - Barndiabetes
  - Barnortopedi
- BKV
- IMT

## Kategori: GynOp - Term: Blod hemoglobin



|                |                                                      |
|----------------|------------------------------------------------------|
| Referenceterm: | <input type="text" value="tmp_16_1066595782636"/>    |
| Namn:          | <input type="text" value="Blod hemoglobin"/>         |
| Etikett:       | <input type="text" value="Blod hemoglobin"/>         |
| Värdeset:      | <input type="text"/>                                 |
| Fälttyp:       | <input type="text" value="Decimal"/>                 |
| Enhet:         | <input type="text" value="g/L"/>                     |
| Kategori:      | <input type="text" value="GynOp"/>                   |
| Status:        | <input type="text" value="ACTIVE"/>                  |
| Beskrivning:   | <input type="text" value="Hb direkt postoperativt"/> |

## Termer

Ablationsmetod  
 Ablationsordning  
 Anestesiform  
 Annan operation  
 Antibiotikaprofylax  
 Antibiotikaprofylax, dosantal  
 Blod hemoglobin  
 Blodning\_peroperativt  
 Blodtransfusion\_peroperativt  
 Blod-Hemoglobin  
 Blod-Hemoglobin; masskoncentration  
 Bukvaggscinision\_typ  
 Cervixdilataionsvidd  
 Cykelfas enl. PAD  
 Cystdiameter\_initialt  
 Endometrieresektat\_vikt  
 Endometriesupprimerande\_forbeh  
 Funktionsniva\_ASA-klass  
 Förbehandlingstid  
 Helt sjukskriven till  
 IUD inlagt  
 Komp\_organ\_skadat  
 Kompl\_postop\_infekt  
 Komplikation, annan  
 Komplikation, postop.  
 Komplikation\_blödning  
 Komplikation\_orsaksrelation  
 Komplikation\_postop  
 Konvertering\_till\_laparotomi  
 Levonova inlagt  
 Livmoderhalslängd  
 Myom, typ  
 Op.indikation, annan  
 Op.komplikation  
 OpKomp\_perop  
 OpKomp\_perop\_skadetyp  
 Op\_komplikation\_typ
